# Supplementary material for: Effect of 9,12-Octadecadiynoic Acid on Neurobehavioral Development in Caenorhabditis elegans
Source: MDPI journal article supplement (doi:10.3390/ijms22168917), 2021-08-18
Supplement: s1 [file s1]

## Supplementary Materials to:

### Effect of 9,12-octadecadiynoic acid on neurobehavioral development in *Caenorhabditis elegans*

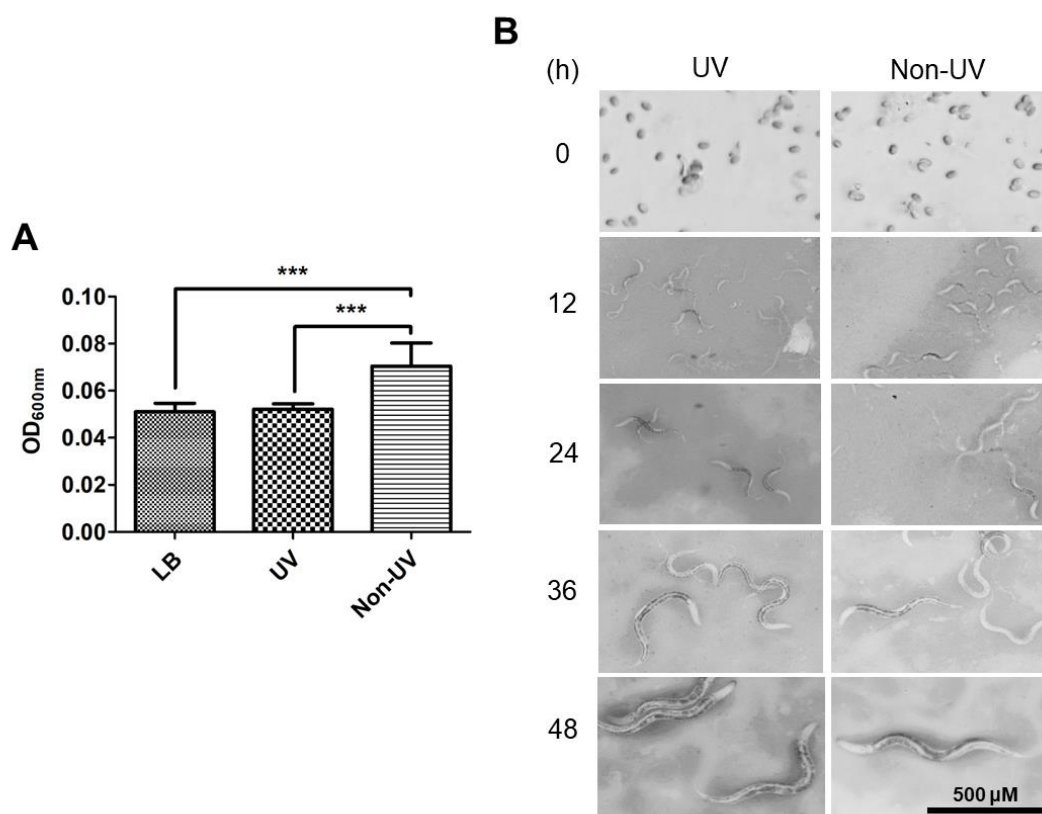

**Supplemental Figure S1.** *E. coli* OP50 with or without UV treatment doesn't affect the growth of L1 larva. NGM plates were seeded with an overnight culture of *E. coli* OP50 as a bacterial lawn. After treating with or without UV overnight, small pieces of bacterial lawn (5 mm<sup>3</sup>) were cut from NGM plates, and then cultured in LB medium for 3 h at 37 °C. (A) The growth of bacteria in liquid culture was measured by the optical density at 600 nm (OD<sub>600nm</sub>). The growth of *E. coli* OP50 was significantly restrained by UV treatment. (mean ± SD, \*\*\**p* < 0.001) (B) *C. elegans* eggs were seeded onto NGM plates containing *E. coli* OP50 and UV-killed *E. coli* OP50 respectively. The growth of worms were observed at the indicated time points.

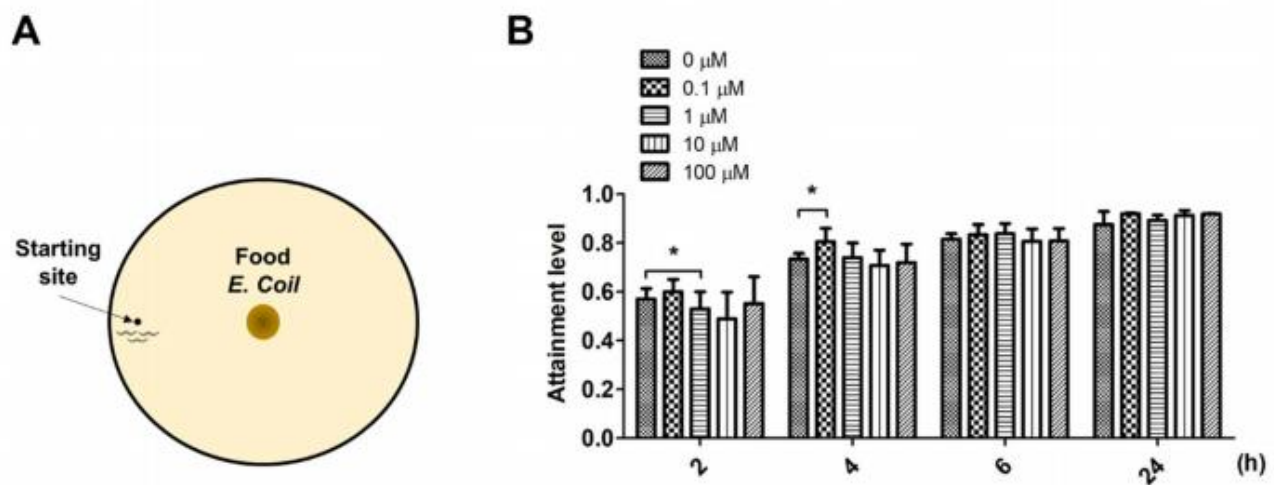

**Supplemental Figure S2.** Effect of 9,12-octadecadiynoic acid on foraging behavior in *C. elegans*. (A) The methodological design of foraging behavior. (B) Influence of 9,12-octadecadiynoic acid in attainment level of worms (mean  $\pm$  SEM, \* $p$  < 0.05).

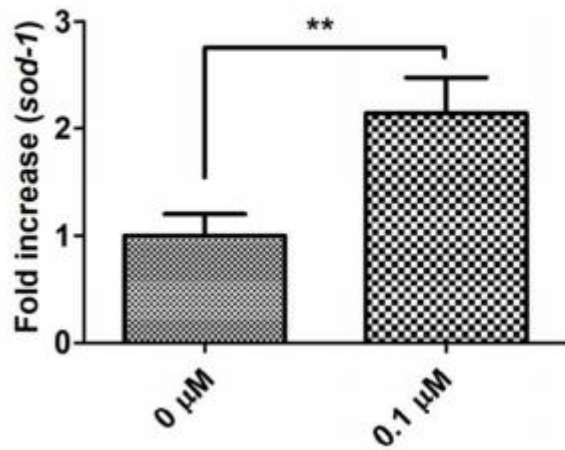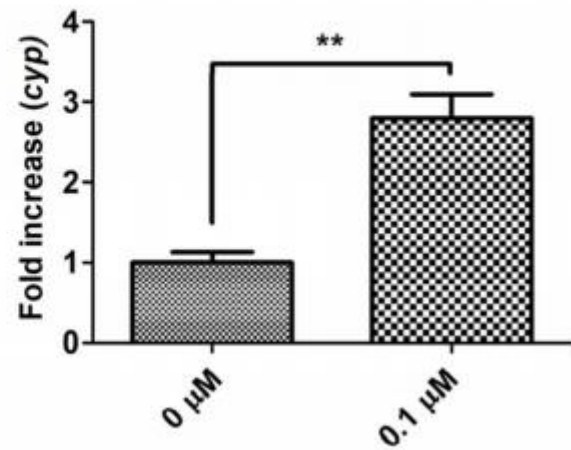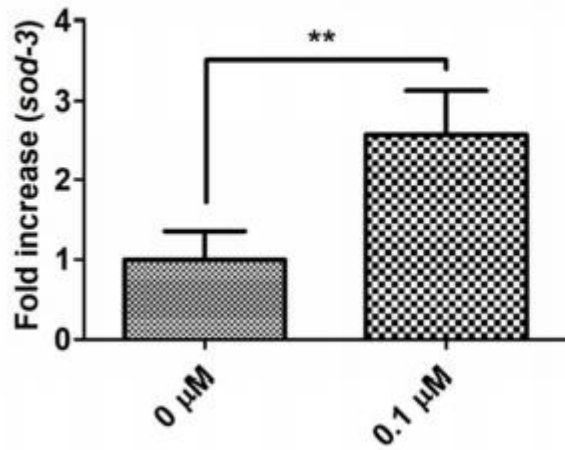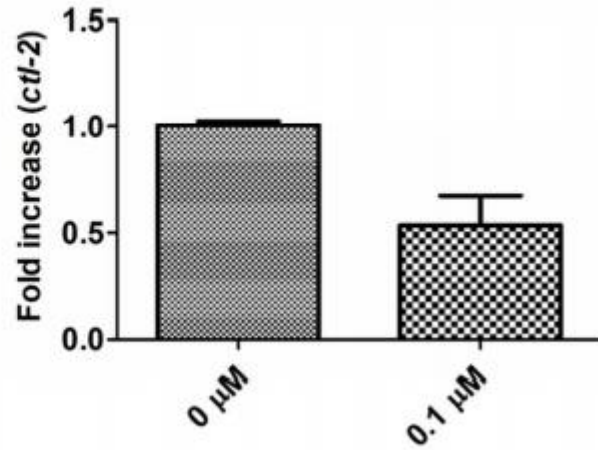

**Supplemental Figure S3.** Analysis of the expression of *sod-1*, *sod-3*, *ctl-2* and *cyp-35A2* in middle adulthood of worms. Worms are supplemented by 0.1  $\mu$ M of 9,12-octadecadiynoic acid from L1 to L4 stage, and analyzed the expression of *sod-1*, *sod-3*, *ctl-2* and *cyp-35A2* at 10<sup>th</sup> day of adults (mean  $\pm$  SD, \*\* $p$  < 0.01).

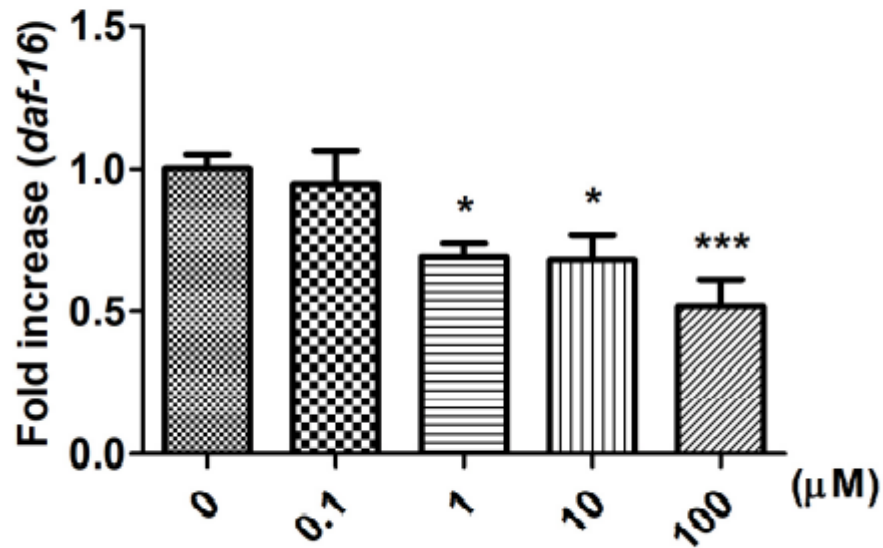

**Supplemental Figure S4.** Analysis of the expression of *daf-16* after larval intake of 9,12-octadecadiynoic acid (mean  $\pm$  SD, \* $p < 0.05$ ; \*\*\* $p < 0.001$ ).
